# Supplementary material for: Potency of CRISPR-Cas Antifungals Is Enhanced by Cotargeting DNA Repair and Growth Regulatory Machinery at the Genetic Level
Source: PubMed Central journal article supplement — ACS Infect Dis. 2023 Nov 13;9(12):2494–503. doi: 10.1021/acsinfecdis.3c00342 (PMC10714396; doi:10.1021/acsinfecdis.3c00342), 2023-11-13
Supplement: id3c00342_si_001.pdf [file id3c00342_si_001.pdf]

## **Supplementary Information**

### **Potency of CRISPR-Cas Antifungals Is Enhanced by Co-targeting DNA Repair and Growth Regulatory Machinery at the Genetic Level**

Brian J. Mendoza<sup>1</sup>, Xianliang Zheng<sup>1</sup>, Jared C. Clements<sup>1</sup>, Christopher Cotter<sup>1</sup>, Cong T. Trinh<sup>1\*</sup>

<sup>1</sup>Department of Chemical and Biomolecular Engineering, University of Tennessee, Knoxville, TN 37996, U.S.A.

\*To whom correspondence should be addressed. Tel: +1 865-974-8121. Email: ctrinh@utk.edu

| strain name | Target gene      | glucose 48h |     |      |      | galactose 48h |     |      |      | glucose 48h | galactose 48h | glucose 48h | galactose 48h |
|-------------|------------------|-------------|-----|------|------|---------------|-----|------|------|-------------|---------------|-------------|---------------|
|             |                  | 1x          | 10x | 100x | 500x | 1x            | 10x | 100x | 500x |             |               |             |               |
| Vip22       | ACC2             | 4           | 2   | 1    | 1    | 3             | 2   | 1    | 0    |             |               |             |               |
| Vip30       | LIG1             | 4           | 3   | 1    | 1    | 3             | 2   | 1    | 0    |             |               |             |               |
| Vip43       | RPS4             | 4           | 3   | 1    | 1    | 4             | 3   | 1    | 1    |             |               |             |               |
| Vip54       | RPL37A/LIF1      | 4           | 3   | 1    | 1    | 1             | 1   | 0    | 0    |             |               |             |               |
| Vip67       | LIF1/RPO22       | 4           | 0   | 1    | 1    | 4             | 1   | 0    | 0    |             |               |             |               |
| Vip76       | RAD52/LIG1       | 4           | 2   | 0    | 0    | 1             | 1   | 0    | 0    |             |               |             |               |
| Vip86       | LIF1/ISP45       | 4           | 3   | 1    | 0    | 1             | 0   | 0    | 0    |             |               |             |               |
| Vip9        | RAD52            | 4           | 3   | 1    | 1    | 4             | 2   | 1    | 0    |             |               |             |               |
| Vip24       | DNA26            | 3           | 2   | 2    | 1    | 2             | 2   | 3    | 2    |             |               |             |               |
| Vip31       | PRF1             | 3           | 3   | 2    | 1    | 3             | 3   | 2    | 2    |             |               |             |               |
| Vip47       | LIF1/DNA19       | 3           | 2   | 1    | 1    | 1             | 0   | 0    | 0    |             |               |             |               |
| Vip55       | RPS13B/LIF1      | 3           | 3   | 2    | 1    | 1             | 0   | 0    | 0    |             |               |             |               |
| Vip68       | RAD52/RPS21      | 1           | 0   | 0    | 0    | 1             | 0   | 0    | 0    |             |               |             |               |
| Vip77       | RAD52/DNA19      | 4           | 3   | 2    | 1    | 3             | 2   | 1    | 0    |             |               |             |               |
| Vip82       | PRF1/RAD51       | 4           | 1   | 0    | 1    | 2             | 1   | 1    | 0    |             |               |             |               |
| Vip25       | DNA43            | 3           | 1   | 0    | 0    | 2             | 2   | 1    | 0    |             |               |             |               |
| Vip2        | "helicase" x64   | 4           | 3   | 1    | 0    | 3             | 2   | 1    | 1    |             |               |             |               |
| Vip44       | RAD51/LIF1       | 4           | 3   | 2    | 1    | 3             | 2   | 1    | 1    |             |               |             |               |
| Vip48       | ACC2/LIF1        | 4           | 3   | 0    | 0    | 1             | 0   | 0    | 0    |             |               |             |               |
| Vip56       | DNA43/RAD51      | 3           | 3   | 1    | 0    | 1             | 0   | 0    | 0    |             |               |             |               |
| Vip69       | RPL17/RAD52      | 3           | 2   | 0    | 0    | 1             | 0   | 0    | 0    |             |               |             |               |
| Vip78       | RAD52/RPL10E     | 3           | 3   | 2    | 0    | 3             | 2   | 1    | 0    |             |               |             |               |
| Vip89       | LIF1/RPS4        | 3           | 1   | 0    | 0    | 1             | 0   | 0    | 0    |             |               |             |               |
| Vip38       | RPL37A           | 3           | 3   | 2    | 1    | 3             | 2   | 2    | 1    |             |               |             |               |
| Vip26       | DNA52            | 2           | 2   | 2    | 2    | 2             | 2   | 2    | 1    |             |               |             |               |
| Vip33       | RPL1             | 2           | 2   | 2    | 2    | 2             | 2   | 2    | 2    |             |               |             |               |
| Vip49       | LIG1/LIF1        | 4           | 2   | 1    | 0    | 3             | 2   | 1    | 1    |             |               |             |               |
| Vip57       | ISP45/RAD51      | 3           | 2   | 1    | 0    | 1             | 0   | 0    | 0    |             |               |             |               |
| Vip71       | RAD51/DNA26      | 2           | 1   | 1    | 0    | 2             | 1   | 1    | 0    |             |               |             |               |
| Vip79       | RAD52/DNA6       | 3           | 2   | 2    | 0    | 2             | 1   | 0    | 0    |             |               |             |               |
| Vip90       | RAD52/RPS4       | 3           | 2   | 1    | 0    | 1             | 0   | 0    | 0    |             |               |             |               |
| Vip58       | RPL10E/RAD51     | 3           | 3   | 2    | 1    | 3             | 2   | 2    | 1    |             |               |             |               |
| Vip27       | DNA6             | 2           | 2   | 2    | 2    | 3             | 2   | 2    | 2    |             |               |             |               |
| Vip36       | RPL17            | 3           | 3   | 2    | 1    | 3             | 2   | 1    | 1    |             |               |             |               |
| Vip51       | RPL10A/LIF1      | 3           | 2   | 1    | 0    | 3             | 1   | 1    | 1    |             |               |             |               |
| Vip59       | RAD51/RPL7       | 3           | 2   | 1    | 0    | 1             | 0   | 0    | 0    |             |               |             |               |
| Vip72       | LIF1/RPL7        | 3           | 3   | 1    | 1    | 3             | 1   | 0    | 0    |             |               |             |               |
| Vip81       | RPS4/RAD51       | 3           | 2   | 1    | 0    | 1             | 0   | 0    | 0    |             |               |             |               |
| Vip93       | ISP42/LIF1       | 3           | 3   | 1    | 1    | 1             | 0   | 0    | 0    |             |               |             |               |
| Vip46       | RAD51/RAD52      | 3           | 3   | 2    | 1    | 3             | 2   | 1    | 1    |             |               |             |               |
| Vip10       | RAD51            | 4           | 4   | 2    | 1    | 1             | 1   | 0    | 0    |             |               |             |               |
| Vip11       | LIF1             | 3           | 2   | 1    | 1    | 2             | 1   | 0    | 0    |             |               |             |               |
| Vip21       | DNA19            | 4           | 4   | 2    | 1    | 2             | 1   | 0    | 0    |             |               |             |               |
| Vip32       | PRS3             | 4           | 4   | 2    | 1    | 2             | 1   | 0    | 0    |             |               |             |               |
| Vip34       | RPL10A           | 4           | 4   | 1    | 0    | 2             | 1   | 0    | 0    |             |               |             |               |
| Vip37       | RPL7             | 4           | 4   | 2    | 1    | 2             | 0   | 0    | 0    |             |               |             |               |
| Vip39       | RPO22            | 4           | 4   | 2    | 1    | 2             | 1   | 0    | 0    |             |               |             |               |
| Vip28       | ISP42            | 3           | 2   | 2    | 2    | 2             | 2   | 2    | 2    |             |               |             |               |
| Vip40       | RPS13B           | 3           | 3   | 1    | 1    | 3             | 2   | 1    | 0    |             |               |             |               |
| Vip52       | LIF1/RPL10E      | 3           | 1   | 1    | 0    | 1             | 0   | 0    | 0    |             |               |             |               |
| Vip60       | RPS21/RAD51      | 3           | 1   | 1    | 0    | 1             | 0   | 0    | 0    |             |               |             |               |
| Vip73       | RPL7/RAD52       | 3           | 2   | 0    | 1    | 1             | 0   | 0    | 0    |             |               |             |               |
| Vip83       | LIF1/DNA6        | 3           | 2   | 1    | 1    | 2             | 1   | 0    | 0    |             |               |             |               |
| Vip94       | RAD52/RPO22      | 3           | 2   | 1    | 0    | 1             | 0   | 0    | 0    |             |               |             |               |
| Vip4        | EXO84            | 3           | 3   | 2    | 2    | 3             | 2   | 2    | 1    |             |               |             |               |
| Vip29       | ISP45            | 3           | 3   | 2    | 2    | 2             | 2   | 2    | 2    |             |               |             |               |
| Vip41       | RPS21            | 4           | 3   | 2    | 0    | 3             | 2   | 1    | 1    |             |               |             |               |
| Vip101      | RAD51/RPS37      | 4           | 3   | 2    | 0    | 3             | 2   | 1    | 1    |             |               |             |               |
| Vip62       | RPL10A/RAD52     | 4           | 2   | 1    | 0    | 3             | 1   | 0    | 0    |             |               |             |               |
| Vip74       | LIF1/RPL1        | 4           | 1   | 1    | 0    | 1             | 0   | 0    | 0    |             |               |             |               |
| Vip84       | ACC2/RAD52       | 4           | 3   | 1    | 0    | 3             | 1   | 1    | 0    |             |               |             |               |
| Vip95       | DNA26/LIF1       | 4           | 3   | 1    | 1    | 3             | 2   | 1    | 1    |             |               |             |               |
| Vip7        | TFC3/"helicase"  | 4           | 1   | 0    | 0    | 2             | 0   | 0    | 0    |             |               |             |               |
| Vip3        | TFC3             | 3           | 2   | 2    | 2    | 2             | 2   | 2    | 2    |             |               |             |               |
| Vip42       | RPS37            | 4           | 3   | 2    | 1    | 3             | 3   | 3    | 1    |             |               |             |               |
| Vip53       | RPL17/LIF1       | 2           | 1   | 0    | 0    | 2             | 1   | 0    | 0    |             |               |             |               |
| Vip66       | DNA19/RAD51      | 3           | 2   | 1    | 1    | 3             | 1   | 0    | 0    |             |               |             |               |
| Vip75       | RAD51/DNA52      | 3           | 2   | 2    | 1    | 3             | 1   | 1    | 0    |             |               |             |               |
| Vip85       | RAD52/RPL1       | 3           | 2   | 2    | 1    | 3             | 3   | 2    | 1    |             |               |             |               |
| Vip98       | RAD51/RPL17      | 3           | 2   | 2    | 1    | 3             | 2   | 1    | 1    |             |               |             |               |
| Vip102      | RAD52/ISP42      | 3           | 2   | 1    | 0    | 2             | 1   | 0    | 0    |             |               |             |               |
| Vip15       | TFC3/RAD51       | 3           | 3   | 2    | 1    | 3             | 1   | 1    | 1    |             |               |             |               |
| Vip17       | TFC3/LIF1        | 3           | 1   | 1    | 1    | 3             | 0   | 0    | 0    |             |               |             |               |
| Vip65       | LIF1/PRS3        | 4           | 3   | 1    | 1    | 2             | 1   | 0    | 0    |             |               |             |               |
| Vip97       | RAD51/LIG1       | 4           | 1   | 1    | 1    | 2             | 1   | 1    | 0    |             |               |             |               |
| Vip45       | RAD52/LIF1       | 3           | 3   | 1    | 1    | 2             | 1   | 1    | 0    |             |               |             |               |
| Vip50       | PRF1/LIF1        | 4           | 3   | 1    | 1    | 3             | 0   | 1    | 0    |             |               |             |               |
| Vip20       | EXO84/LIF1       | 4           | 3   | 2    | 1    | 3             | 1   | 1    | 0    |             |               |             |               |
| Vip8        | EXO84/"helicase" | 4           | 3   | 2    | 1    | 3             | 1   | 1    | 1    |             |               |             |               |
| Vip64       | DNA52/LIF1       | 3           | 2   | 1    | 0    | 3             | 0   | 0    | 0    |             |               |             |               |
| Vip87       | DNA26/RAD52      | 3           | 2   | 1    | 0    | 3             | 0   | 0    | 0    |             |               |             |               |
| Vip18       | EXO84/RAD51      | 3           | 2   | 1    | 1    | 3             | 1   | 0    | 0    |             |               |             |               |
| Vip120      | LIF1/RPS21       | 3           | 2   | 1    | 0    | 2             | 0   | 0    | 0    |             |               |             |               |
| Vip19       | EXO84/RAD52      | 3           | 1   | 1    | 1    | 1             | 1   | 0    | 0    |             |               |             |               |
| Vip105      | RAD52/DNA43      | 2           | 2   | 0    | 1    | 3             | 2   | 1    | 1    |             |               |             |               |
| Vip63       | RAD51/RPL10A     | 3           | 3   | 0    | 2    | 2             | 1   | 0    | 0    |             |               |             |               |
| Vip96       | LIF1/DNA43       | 3           | 3   | 0    | 2    | 2             | 1   | 0    | 0    |             |               |             |               |
| Vip16       | TFC3/RAD52       | 3           | 3   | 0    | 2    | 2             | 1   | 0    | 0    |             |               |             |               |

**Figure S1:** Screening potency of CRISPR-Cas antifungals. Vip strains that harbor gRNAs targeting 23 essential (E), 3 defensive (D), 3 defensive-defensive (D-D), and 56 essential-defensive (E-D) genes were characterized for growth using the serial dilution (1x, 10x, 100x, 500x) growth assay on solid media at 28°C after 48 h. CRISPR-Cas9 systems were active in the presence of galactose but were inactive in the presence of glucose (negative control). Growth phenotypes were ranked from 0 to 4, with 0 indicating no growth and 4 indicating a healthy colony and used to generate the heat map. A subset of the top 17 strains whose names are shown in red exhibited high potency of CRISPR-Cas antifungals, co-targeting both essential and defensive genes. These strains were selected based on the criteria that they grew well on glucose plates but could not grow on galactose plates after 48 h. Biological replicates: n = 2.

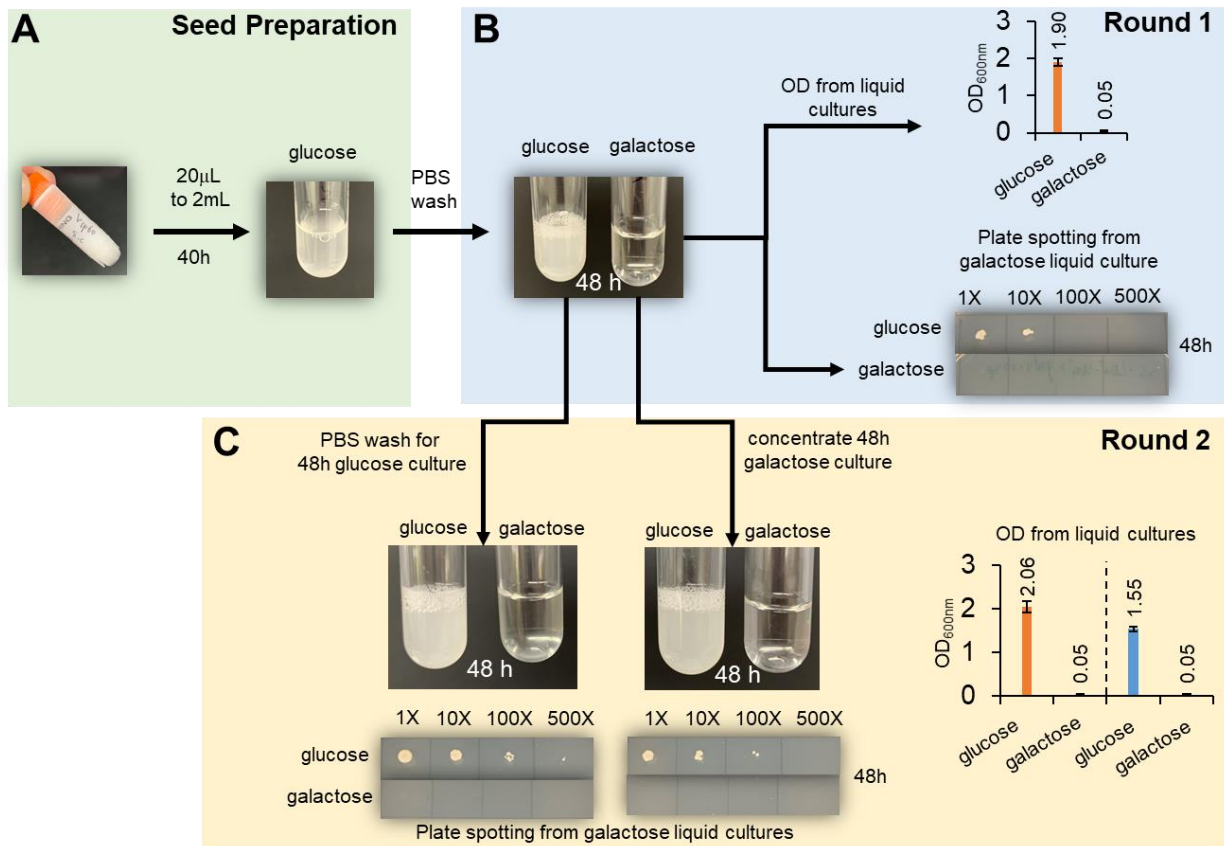

**Figure S2:** Effect of growth adaptation in liquid cultures on potency of CRISPR-Cas antifungal (Vip60). **(A)** Seed preparation. **(B)** Round 1 of CRISPR-Cas antifungal treatment. **(C)** Round 2 of CRISPR-Cas treatment. Experiments were performed in biological triplicates.

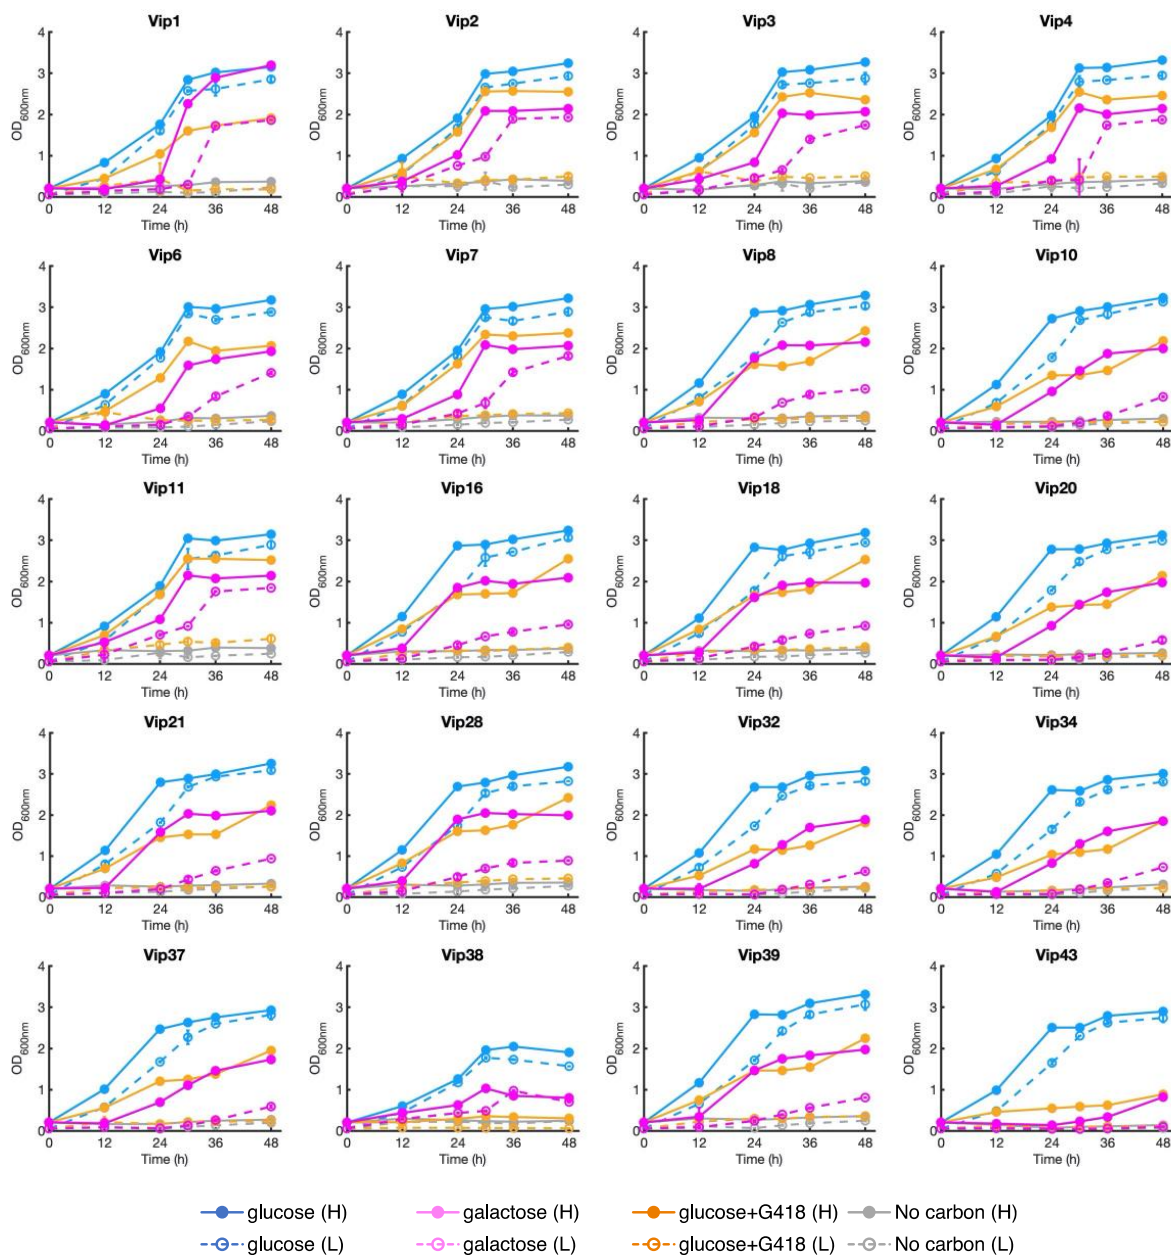

**Figure S3.** Effect of cell inoculation density on escapee proliferation in non-top performing Vip strains. Strains were investigated with an inoculation OD of either 0.05 (L) or 0.2 (H). The escape phenomenon was more pronounced for less effective Vip strains at both high and low inoculation densities.

Figure S3

|                      |                                                                                                                            |       |
|----------------------|----------------------------------------------------------------------------------------------------------------------------|-------|
| <b>Vip10: RAD51</b>  |                                                                                                                            |       |
| WT                   | GTTCAAGAACACATATATATCAGAGTCACAGCTTCAGTACGGGAACGGTTCGTTGATGTCCACTGTACCAGCAGACCTTTCACAGTCAGTCGTTGATG                         | 89.7% |
| #1                   | GTTCAAGAACACATATATCAGA-----AGTCAGTCGTTGATG                                                                                 | 1.0%  |
| #2                   | GTTCAAGAACACATATATCAGAG-----TCACAGTCAGTCGTTGATG                                                                            | 2.5%  |
| #3                   | GTTCAAGAACACATATATCAGAG-----TAGACCTTTCACAGTCAGTCGTTGATG                                                                    | 3.7%  |
| #4                   | GTTCAAGAACACATATATCAGAGT-----CAGCAGACCTTTCACAGTCAGTCGTTGATG                                                                | 3.1%  |
| <b>Vip21: DNA19</b>  |                                                                                                                            |       |
| WT                   | AAAAGCGTAGTACCGCTCCTCTTAAGCTAGAGGACAAGAAGCTTTCAGTACATATGACCATTCCATGACCTTAGGAGCGGACTTATCGTCGATGCTAT                         | 99.4% |
| #1                   | AAAAGCG-----CTA--GGACAAAGAAGCTTTCAGTACATATGACCATTCCATGACCTTAGGAGCGGACTTATCGTCGATGCTAT                                      | 0.2%  |
| #2                   | AAAAGCT-----CCTTAAGCTAGAGGACAAGAAGCTTTCAGTACATATGACCATTCCATGACCTTAGGAGCGGACTTATCGTCGATGCTAT                                | 0.2%  |
| #3                   | AAAAGCG-----CTA--G-----TAC--C-----GTCCTAT                                                                                  | 0.2%  |
| <b>Vip28: ISP42</b>  |                                                                                                                            |       |
| WT                   | ACCAATAACCGACGTGAATCATGTCTGCACCACTCCATTAGCAGAGGCCCTCAAATCCCACATATCCCGGCCCTTCTCCTTTGACTGCGAAGCAATCC                         | 91.5% |
| #1                   | ACCAATAACCGACGTGAATCATGTCTGCACCAC--CCATT--GCAGAGGCC--CTCAAATCCCACATATCCCGGCCCTTCTCCTTTGACTGCGAAGCAATCC                     | 8.5%  |
| <b>Vip32: PRS3</b>   |                                                                                                                            |       |
| No mutation          | 0.0%                                                                                                                       |       |
| <b>Vip34: RPL10A</b> |                                                                                                                            |       |
| WT                   | CCAACCTAGACCAGCAAGGCTAGAAGATTGGTTACAAAGCTAAGCAAGGTTTCGTTATCTACCGTGTACAGAGTTAGACGTGTTAACAGAAAGAGA                           | 93.9% |
| #1                   | CCAACCTAGACCAGCAAGGCTAGAAGATTGGTTACAAA--AGCAAGGTTTCGTTATCTACCGTGTACAGAGTTAGACGTGTTAACAGAAAGAGA                             | 6.1%  |
| <b>Vip43: RPS4</b>   |                                                                                                                            |       |
| WT                   | CAACTAATTAAGTAATGTCTGCTCCAGAAGCTCAACAACAAAAGAGAGGTGGTTTCGTTGGCCGTAACAGAGGCCGTCAAAACAGAAAGGACCAAG                           | 98.6% |
| #1                   | CAACTAATTAAGTAATGTCTGCT-----GGTGGCCGTAACAGAGGCCGTCAAAACAGAAAGGACCAAG                                                       | 1.4%  |
| <b>Vip48: LIF1</b>   |                                                                                                                            |       |
| WT                   | ATTTATGTAGGTTGCTATGTCCTCCAGCTGACGGAGTTCATTAGCTGTATCCCT---CTGGTTAATGAAGAACAAAATGAAG                                         | 90.5% |
| #1                   | ATTTATGTAGGTTGCTATGTCCTCCAGCTGACGGAGTTCATTAGCTCC---CT---CTGGTTAATGAAGAACAAAATGAAG                                          | 7.7%  |
| #2                   | ATTTATGTAGGTTGCTATGTCCTCCAGCTGACGGAGTTCATTAGCTGTA---T---CTGGTTAATGAAGAACAAAATGAAG                                          | 1.5%  |
| #3                   | ATTTATGTAGGTTGCTATGTCCTCCAGCTGACGGAGTTCATTAGCTGTATCCCTGGACTGGTTAATGAAGAACAAAATGAAG                                         | 0.3%  |
| <b>ACC2</b>          |                                                                                                                            |       |
| WT                   | TTTCAACTAATATGAATGTATTAGTCTATAATGGCCCAAGGACTACGCCAGGATCAGTTAAGCATGC                                                        | 65.0% |
| #1                   | TTTCAACTAATATGAATGTATTAGTCTATAATGG--CAGGACTACGCCAGGATCAGTTAAGCATGC                                                         | 35.0% |
| <b>Vip52: RPL10E</b> |                                                                                                                            |       |
| No mutation          | 0.0%                                                                                                                       |       |
| <b>LIF1</b>          |                                                                                                                            |       |
| No mutation          | 0.0%                                                                                                                       |       |
| <b>Vip54: RPL37A</b> |                                                                                                                            |       |
| No mutation          | 0.0%                                                                                                                       |       |
| <b>LIF1</b>          |                                                                                                                            |       |
| WT                   | GGTGCTATGTCCAGCTGACGGAGTTCATTAGCTGTATCCCTCTGGTTAATGAAGAACAAAATGAAGAAGATGAGCGTGGCCCTCTG                                     | 98.5% |
| #1                   | GGTGCTATGTCC---TCGGTTAATGAAGAACAAAATGAAGAAGATGAGCGTGGCCCTCTG                                                               | 1.5%  |
| #2                   | GGTGCTATGTCCAGCTGACGGAGTTC---GCTGTATCCCTCTGGTTAATGAAGAACAAAATGAAGAAGATGAGCGTGGCCCTCTG                                      | <0.1% |
| <b>Vip55: RPS13</b>  |                                                                                                                            |       |
| No mutation          | 0.0%                                                                                                                       |       |
| <b>LIF1*</b>         |                                                                                                                            |       |
| No mutation          | 0.0%                                                                                                                       |       |
| <b>Vip56: DNA43</b>  |                                                                                                                            |       |
| No mutation          | 0.0%                                                                                                                       |       |
| <b>RAD51*</b>        |                                                                                                                            |       |
| No mutation          | 0.0%                                                                                                                       |       |
| <b>Vip57: ISP45</b>  |                                                                                                                            |       |
| No mutation          | 0.0%                                                                                                                       |       |
| <b>RAD51</b>         |                                                                                                                            |       |
| WT                   | CAAGAACAACATATATCAGAGTCACAGCTTCAGTACGGGAACGGTTCGTTGATGTCCACTGTACCAGCAGACCTTTCACAGTCAGTCGTTGATGGAACGGCAACGGTAGCAGCGAAGATATT | 91.2% |
| #1                   | CAAGAACAACATATATCAAT-----GTCCACTGTACCAGCAGACCTTTCACAGTCAGTCGTTGATGGAACGGCAACGGTAGCAGCGAAGATATT                             | 5.0%  |
| #2                   | CAAGAACAACATATATCA-----GACCACGTACCAGCAGACCTTTCACAGTCAGTCGTTGATGGAACGGCAACGGTAGCAGCGAAGATATT                                | 1.5%  |
| #3                   | CAAGAACAACATATATCAGAG-----TCACA-----GC---TTATT                                                                             | 2.3%  |
| <b>Vip60: RPS21</b>  |                                                                                                                            |       |
| No mutation          | 0.0%                                                                                                                       |       |
| <b>RAD51</b>         |                                                                                                                            |       |
| WT                   | AGAACAACATATATCAGAGTCACAGCTT--CAGTACGGGAACGGTTCGTTGATGTCCACTGTACCAGCAGACCTTTCACAGTCAGTCGTTGATGGAACCGG                      | 72.8% |
| #1                   | AGAACAACATATATCAGAGTCACAGCTTTAAGTACGGGAACGGTTCGTTGATGTCCACTGTACCAGCAGACCTTTCACAGTCAGTCGTTGATGGAACCGG                       | 15.0% |
| #2                   | AGAACAACATATATCAGAGTCACAGC-----TGTCGTTGATGGAACCGG                                                                          | 12.2% |
| <b>Vip94: RPO22</b>  |                                                                                                                            |       |
| No mutation          | 0.0%                                                                                                                       |       |
| <b>RAD52</b>         |                                                                                                                            |       |
| WT                   | GGATGAGAAGAAGCCCGTTTTCGGTAACCAATCCAGG---ACATACAGACAAAATGGACAAGAANAATAGGACCTGAGTATATCTCCAAGAGATTGGGT                        | 79.3% |
| #1                   | GGATGAGAAGAAGCCCGTTTTCGGTAACCAATCCAGGAGACATACAGACAAAATGGACAAGAANAATAGGACCTGAGTATATCTCCAAGAGATTGGGT                         | 20.7% |

**Figure S4:** Sequence alignments from targeted amplicon sequencing of representative single- and co-targeted strains. Mutation ID numbers correspond to those presented in Figure 4B. PAM sequences are highlighted in blue (sense) and pink (antisense).

**Table S1:** Gene annotation. Sources: Saccharomyces Genome database. See <https://www.yeastgenome.org/>

| <b>Gene Alias<br/>(Used in this paper)</b> | <b>Standard<br/>Name</b> | <b>Name Description</b>                         | <b>SGD ID</b> |
|--------------------------------------------|--------------------------|-------------------------------------------------|---------------|
| LIF1                                       | LIF1                     | Ligase Interacting Factor                       | S000003058    |
| RAD51                                      | RAD51                    | RADiation sensitive                             | S000000897    |
| RAD52                                      | RAD52                    | RADiation sensitive                             | S000004494    |
| ACC2                                       | BPL1                     | Biotin:apoProtein Ligase                        | S000002300    |
| DNA19                                      | CDC36                    | Cell Division Cycle                             | S000002324    |
| DNA26                                      | PRT1                     | PRoTein synthesis                               | S000005888    |
| DNA43                                      | MCM10                    | MiniChromosome Maintenance                      | S000001412    |
| DNA52                                      | DBF4                     | DumbBell Former                                 | S000002459    |
| DNA6                                       | CDC34                    | Cell Division Cycle                             | S000002461    |
| EXO84                                      | EXO84                    | EXOcyst                                         | S000000306    |
| ISP42                                      | TOM40                    | Translocase of the Outer Mitochondrial membrane | S000004816    |
| ISP45                                      | TIM44                    | Translocase of the Inner Mitochondrial membrane | S000001284    |
| LIG1                                       | TRL1                     | tRNA Ligase                                     | S000003623    |
| PRF1                                       | PFY1                     | ProFilin of Yeast                               | S000005648    |
| PRS3                                       | PRS3                     | PhosphoRibosylpyrophosphate Synthetase          | S000001003    |
| RPL1                                       | RPL5                     | Ribosomal Protein of the Large subunit          | S000006052    |
| RPL10A                                     | RPL15A                   | Ribosomal Protein of the Large subunit          | S000004019    |
| RPL10E                                     | RPP0                     | Ribosomal Protein P0                            | S000004332    |
| RPL17                                      | RPL17A                   | Ribosomal Protein of the Large subunit          | S000001663    |
| RPL37A                                     | RPL37A                   | Ribosomal Protein of the Large subunit          | S000004175    |
| RPL7                                       | RLP7                     | Ribosomal-Like Protein                          | S000004947    |
| RPO22                                      | RPB2                     | RNA Polymerase B                                | S000005677    |
| RPS13B                                     | RPS13                    | Ribosomal Protein of the Small subunit          | S000002471    |
| RPS21                                      | RPS15                    | Ribosomal Protein of the Small subunit          | S000005400    |
| RPS37                                      | RPS31                    | Ribosomal Protein of the Small subunit          | S000004157    |
| RPS4                                       | RPS2                     | Ribosomal Protein of the Small subunit          | S000003091    |
| TFC3                                       | TFC3                     | Transcription Factor class C                    | S000000001    |

**Table S2:** List of plasmids. Abbreviations: E, essential; D, defensive. See Table S1 for gene annotation.

| Plasmid ID | Parent Plasmid | Genes targeted           | Gene code | Sources        |
|------------|----------------|--------------------------|-----------|----------------|
| p415       |                | Cas9 under GalL promoter |           | AddGene #43804 |
| p426       |                | gRNA plasmid             |           | AddGene #43803 |
| pBM017     | p426           | EXO84                    | E         | This study     |
| pBM022     | p426           | RAD52                    | D         | This study     |
| pBM023     | p426           | RAD51                    | D         | This study     |
| pBM024     | p426           | LIF1                     | D         | This study     |
| pBM025     | p426           | EXO84                    | ED        | This study     |
| pBM026     | p426           | EXO84                    | ED        | This study     |
| pBM027     | p426           | EXO84                    | ED        | This study     |
| pBM028     | p426           | TFC3                     | ED        | This study     |
| pBM029     | p426           | TFC3                     | ED        | This study     |
| pBM030     | p426           | TFC3                     | ED        | This study     |
| pBM038     | p426           | TFC3                     | E         | This study     |
| pBM041     | p426           | ACC2                     | E         | This study     |
| pBM043     | p426           | DNA19                    | E         | This study     |
| pBM044     | p426           | DNA26                    | E         | This study     |
| pBM045     | p426           | DNA43                    | E         | This study     |
| pBM046     | p426           | DNA52                    | E         | This study     |
| pBM047     | p426           | DNA6                     | E         | This study     |
| pBM048     | p426           | ISP42                    | E         | This study     |
| pBM049     | p426           | ISP45                    | E         | This study     |
| pBM050     | p426           | LIG1                     | E         | This study     |
| pBM051     | p426           | PRF1                     | E         | This study     |
| pBM052     | p426           | PRS3                     | E         | This study     |
| pBM053     | p426           | RPL1                     | E         | This study     |
| pBM054     | p426           | RPL10A                   | E         | This study     |
| pBM056     | p426           | RPL17                    | E         | This study     |
| pBM057     | p426           | RPL7                     | E         | This study     |
| pBM058     | p426           | RPL37A                   | E         | This study     |
| pBM059     | p426           | RPO22                    | E         | This study     |
| pBM060     | p426           | RPS13B                   | E         | This study     |
| pBM061     | p426           | RPS21                    | E         | This study     |
| pBM062     | p426           | RPS37                    | E         | This study     |



|        |      |        |        |   |    |            |
|--------|------|--------|--------|---|----|------------|
| pBM063 | p426 | RPS4   | .      | . | E  | This study |
| pBM064 | p426 | RAD51  | LIF1   | . | DD | This study |
| pBM065 | p426 | RAD52  | LIF1   | . | DD | This study |
| pBM066 | p426 | RAD51  | RAD52  | . | DD | This study |
| pBM067 | p426 | LIF1   | DNA19  | . | ED | This study |
| pBM068 | p426 | ACC2   | LIF1   | . | ED | This study |
| pBM069 | p426 | LIG1   | LIF1   | . | ED | This study |
| pBM070 | p426 | PRF1   | LIF1   | . | ED | This study |
| pBM071 | p426 | RPL10A | LIF1   | . | ED | This study |
| pBM072 | p426 | LIF1   | RPL10E | . | ED | This study |
| pBM073 | p426 | RPL17  | LIF1   | . | ED | This study |
| pBM074 | p426 | RPL37A | LIF1   | . | ED | This study |
| pBM075 | p426 | RPS13B | LIF1   | . | ED | This study |
| pBM076 | p426 | DNA43  | RAD51  | . | ED | This study |
| pBM077 | p426 | ISP45  | RAD51  | . | ED | This study |
| pBM078 | p426 | RPL10E | RAD51  | . | ED | This study |
| pBM079 | p426 | RAD51  | RPL7   | . | ED | This study |
| pBM080 | p426 | RPS21  | RAD51  | . | ED | This study |
| pBM082 | p426 | RPL10A | RAD52  | . | ED | This study |
| pBM083 | p426 | RAD51  | RPL10A | . | ED | This study |
| pBM084 | p426 | DNA52  | LIF1   | . | ED | This study |
| pBM085 | p426 | LIF1   | PRS3   | . | ED | This study |
| pBM086 | p426 | DNA19  | RAD51  | . | ED | This study |
| pBM087 | p426 | LIF1   | RPO22  | . | ED | This study |
| pBM088 | p426 | RAD52  | RPS21  | . | ED | This study |
| pBM089 | p426 | RPL17  | RAD52  | . | ED | This study |
| pBM091 | p426 | RAD51  | DNA26  | . | ED | This study |
| pBM092 | p426 | LIF1   | RPL7   | . | ED | This study |
| pBM093 | p426 | RPL7   | RAD52  | . | ED | This study |
| pBM094 | p426 | LIF1   | RPL1   | . | ED | This study |
| pBM095 | p426 | RAD51  | DNA52  | . | ED | This study |
| pBM096 | p426 | RAD52  | LIG1   | . | ED | This study |
| pBM097 | p426 | RAD52  | DNA19  | . | ED | This study |
| pBM098 | p426 | RAD52  | RPL10E | . | ED | This study |
| pBM099 | p426 | RAD52  | DNA6   | . | ED | This study |
| pBM101 | p426 | RPS4   | RAD51  | . | ED | This study |
| pBM102 | p426 | PRF1   | RAD51  | . | ED | This study |
| pBM103 | p426 | LIF1   | DNA6   | . | ED | This study |

|        |      |       |       |   |    |            |
|--------|------|-------|-------|---|----|------------|
| pBM104 | p426 | ACC2  | RAD52 | . | ED | This study |
| pBM105 | p426 | RAD52 | RPL1  | . | ED | This study |
| pBM106 | p426 | LIF1  | ISP45 | . | ED | This study |
| pBM107 | p426 | DNA26 | RAD52 | . | ED | This study |
| pBM109 | p426 | LIF1  | RPS4  | . | ED | This study |
| pBM110 | p426 | RAD52 | RPS4  | . | ED | This study |
| pBM113 | p426 | ISP42 | LIF1  | . | ED | This study |
| pBM114 | p426 | RAD52 | RPO22 | . | ED | This study |
| pBM115 | p426 | DNA26 | LIF1  | . | ED | This study |
| pBM116 | p426 | LIF1  | DNA43 | . | ED | This study |
| pBM117 | p426 | RAD51 | LIG1  | . | ED | This study |
| pBM118 | p426 | RAD51 | RPL17 | . | ED | This study |
| pBM121 | p426 | RAD51 | RPS37 | . | ED | This study |
| pBM122 | p426 | RAD52 | ISP42 | . | ED | This study |
| pBM125 | p426 | RAD52 | DNA43 | . | ED | This study |
| pBM140 | p426 | LIF1  | RPS21 | . | ED | This study |

**Table S3:** List of strains. See Table S1 for gene annotation.

| Strain name | Parent strain                                            | Contains plasmids: |        | Genes targeted: |       |   | Sources    |
|-------------|----------------------------------------------------------|--------------------|--------|-----------------|-------|---|------------|
| BY4741      | S. cerevisiae MAT a, ura3d0, his3-d200, leu2-d0, met15-d |                    |        |                 |       |   | ATCC       |
| Vip3        | BY4741                                                   | p415               | pBM038 | TFC3            | .     | . | This study |
| Vip4        | BY4741                                                   | p415               | pBM017 | EXO84           | .     | . | This study |
| Vip9        | BY4741                                                   | p415               | pBM022 | RAD52           | .     | . | This study |
| Vip10       | BY4741                                                   | p415               | pBM023 | RAD51           | .     | . | This study |
| Vip11       | BY4741                                                   | p415               | pBM024 | LIF1            | .     | . | This study |
| Vip15       | BY4741                                                   | p415               | pBM029 | TFC3            | RAD51 | . | This study |
| Vip16       | BY4741                                                   | p415               | pBM028 | TFC3            | RAD52 | . | This study |
| Vip17       | BY4741                                                   | p415               | pBM030 | TFC3            | LIF1  | . | This study |
| Vip18       | BY4741                                                   | p415               | pBM026 | EXO84           | RAD51 | . | This study |
| Vip19       | BY4741                                                   | p415               | pBM025 | EXO84           | RAD52 | . | This study |
| Vip20       | BY4741                                                   | p415               | pBM027 | EXO84           | LIF1  | . | This study |
| Vip21       | BY4741                                                   | p415               | pBM043 | DNA19           | .     | . | This study |
| Vip22       | BY4741                                                   | p415               | pBM041 | ACC2            | .     | . | This study |
| Vip24       | BY4741                                                   | p415               | pBM044 | DNA26           | .     | . | This study |
| Vip25       | BY4741                                                   | p415               | pBM045 | DNA43           | .     | . | This study |
| Vip26       | BY4741                                                   | p415               | pBM046 | DNA52           | .     | . | This study |
| Vip27       | BY4741                                                   | p415               | pBM047 | DNA6            | .     | . | This study |
| Vip28       | BY4741                                                   | p415               | pBM048 | ISP42           | .     | . | This study |
| Vip29       | BY4741                                                   | p415               | pBM049 | ISP45           | .     | . | This study |
| Vip30       | BY4741                                                   | p415               | pBM050 | LIG1            | .     | . | This study |
| Vip31       | BY4741                                                   | p415               | pBM051 | PRF1            | .     | . | This study |
| Vip32       | BY4741                                                   | p415               | pBM052 | PRS3            | .     | . | This study |
| Vip33       | BY4741                                                   | p415               | pBM053 | RPL1            | .     | . | This study |
| Vip34       | BY4741                                                   | p415               | pBM054 | RPL10A          | .     | . | This study |
| Vip36       | BY4741                                                   | p415               | pBM056 | RPL17           | .     | . | This study |
| Vip37       | BY4741                                                   | p415               | pBM057 | RPL7            | .     | . | This study |
| Vip38       | BY4741                                                   | p415               | pBM058 | RPL37A          | .     | . | This study |
| Vip39       | BY4741                                                   | p415               | pBM059 | RPO22           | .     | . | This study |
| Vip40       | BY4741                                                   | p415               | pBM060 | RPS13B          | .     | . | This study |
| Vip41       | BY4741                                                   | p415               | pBM061 | RPS21           | .     | . | This study |
| Vip42       | BY4741                                                   | p415               | pBM062 | RPS37           | .     | . | This study |
| Vip43       | BY4741                                                   | p415               | pBM063 | RPS4            | .     | . | This study |
| Vip44       | BY4741                                                   | p415               | pBM064 | RAD51           | LIF1  | . | This study |
| Vip45       | BY4741                                                   | p415               | pBM065 | RAD52           | LIF1  | . | This study |

|       |        |      |        |        |        |   |            |
|-------|--------|------|--------|--------|--------|---|------------|
| Vip46 | BY4741 | p415 | pBM066 | RAD51  | RAD52  | . | This study |
| Vip47 | BY4741 | p415 | pBM067 | LIF1   | DNA19  | . | This study |
| Vip48 | BY4741 | p415 | pBM068 | ACC2   | LIF1   | . | This study |
| Vip49 | BY4741 | p415 | pBM069 | LIG1   | LIF1   | . | This study |
| Vip50 | BY4741 | p415 | pBM070 | PRF1   | LIF1   | . | This study |
| Vip51 | BY4741 | p415 | pBM071 | RPL10A | LIF1   | . | This study |
| Vip52 | BY4741 | p415 | pBM072 | LIF1   | RPL10E | . | This study |
| Vip53 | BY4741 | p415 | pBM073 | RPL17  | LIF1   | . | This study |
| Vip54 | BY4741 | p415 | pBM074 | RPL37A | LIF1   | . | This study |
| Vip55 | BY4741 | p415 | pBM075 | RPS13B | LIF1   | . | This study |
| Vip56 | BY4741 | p415 | pBM076 | DNA43  | RAD51  | . | This study |
| Vip57 | BY4741 | p415 | pBM077 | ISP45  | RAD51  | . | This study |
| Vip58 | BY4741 | p415 | pBM078 | RPL10E | RAD51  | . | This study |
| Vip59 | BY4741 | p415 | pBM079 | RAD51  | RPL7   | . | This study |
| Vip60 | BY4741 | p415 | pBM080 | RPS21  | RAD51  | . | This study |
| Vip62 | BY4741 | p415 | pBM082 | RPL10A | RAD52  | . | This study |
| Vip63 | BY4741 | p415 | pBM083 | RAD51  | RPL10A | . | This study |
| Vip64 | BY4741 | p415 | pBM084 | DNA52  | LIF1   | . | This study |
| Vip65 | BY4741 | p415 | pBM085 | LIF1   | PRS3   | . | This study |
| Vip66 | BY4741 | p415 | pBM086 | DNA19  | RAD51  | . | This study |
| Vip67 | BY4741 | p415 | pBM087 | LIF1   | RPO22  | . | This study |
| Vip68 | BY4741 | p415 | pBM088 | RAD52  | RPS21  | . | This study |
| Vip69 | BY4741 | p415 | pBM089 | RPL17  | RAD52  | . | This study |
| Vip71 | BY4741 | p415 | pBM091 | RAD51  | DNA26  | . | This study |
| Vip72 | BY4741 | p415 | pBM092 | LIF1   | RPL7   | . | This study |
| Vip73 | BY4741 | p415 | pBM093 | RPL7   | RAD52  | . | This study |
| Vip74 | BY4741 | p415 | pBM094 | LIF1   | RPL1   | . | This study |
| Vip75 | BY4741 | p415 | pBM095 | RAD51  | DNA52  | . | This study |
| Vip76 | BY4741 | p415 | pBM096 | RAD52  | LIG1   | . | This study |
| Vip77 | BY4741 | p415 | pBM097 | RAD52  | DNA19  | . | This study |
| Vip78 | BY4741 | p415 | pBM098 | RAD52  | RPL10E | . | This study |
| Vip79 | BY4741 | p415 | pBM099 | RAD52  | DNA6   | . | This study |
| Vip81 | BY4741 | p415 | pBM101 | RPS4   | RAD51  | . | This study |
| Vip82 | BY4741 | p415 | pBM102 | PRF1   | RAD51  | . | This study |
| Vip83 | BY4741 | p415 | pBM103 | LIF1   | DNA6   | . | This study |
| Vip84 | BY4741 | p415 | pBM104 | ACC2   | RAD52  | . | This study |
| Vip85 | BY4741 | p415 | pBM105 | RAD52  | RPL1   | . | This study |
| Vip86 | BY4741 | p415 | pBM106 | LIF1   | ISP45  | . | This study |

|        |        |      |        |       |       |   |            |
|--------|--------|------|--------|-------|-------|---|------------|
| Vip87  | BY4741 | p415 | pBM107 | DNA26 | RAD52 | . | This study |
| Vip89  | BY4741 | p415 | pBM109 | LIF1  | RPS4  | . | This study |
| Vip90  | BY4741 | p415 | pBM110 | RAD52 | RPS4  | . | This study |
| Vip93  | BY4741 | p415 | pBM113 | ISP42 | LIF1  | . | This study |
| Vip94  | BY4741 | p415 | pBM114 | RAD52 | RPO22 | . | This study |
| Vip95  | BY4741 | p415 | pBM115 | DNA26 | LIF1  | . | This study |
| Vip96  | BY4741 | p415 | pBM116 | LIF1  | DNA43 | . | This study |
| Vip97  | BY4741 | p415 | pBM117 | RAD51 | LIG1  | . | This study |
| Vip98  | BY4741 | p415 | pBM118 | RAD51 | RPL17 | . | This study |
| Vip101 | BY4741 | p415 | pBM121 | RAD51 | RPS37 | . | This study |
| Vip102 | BY4741 | p415 | pBM122 | RAD52 | ISP42 | . | This study |
| Vip105 | BY4741 | p415 | pBM125 | RAD52 | DNA43 | . | This study |
| Vip120 | BY4741 | p415 | pBM140 | LIF1  | RPS21 | . | This study |

**Table S4:** List of primers.

| <b>Primer Name</b> | <b>Sequence (5' - 3')</b>                                                                                                                                                                                                                                                            | <b>Description</b>                                           |
|--------------------|--------------------------------------------------------------------------------------------------------------------------------------------------------------------------------------------------------------------------------------------------------------------------------------|--------------------------------------------------------------|
| AT_gRNA_BB_F       | cagcacatcccccttcg                                                                                                                                                                                                                                                                    | gRNA swap B.B. amplification                                 |
| AT_gRNA_BB_R       | ggcggtttgcgtattgg                                                                                                                                                                                                                                                                    | gRNA swap B.B. amplification                                 |
| AT_gRNA_swap_F     | gcgagtcagtgagcgag                                                                                                                                                                                                                                                                    | Generic gRNA swap primer, amplifying towards SNR52 promoter  |
| AT_gRNA_swap_R     | gatcgggtcgggcctc                                                                                                                                                                                                                                                                     | Generic gRNA swap primer, amplifying towards SUP4 terminator |
| Linker Sequence    | tctttgaaaagataatgtatgattatgcttcactcatattatacagaaacttgatgttttcttcgagtat<br>atacaagggtgattacatgtacgtttgaagtacaactctagattttgtagtgcctcttgggctagcgg<br>taaagggtgcgcatttttcacacctacaatgttctgtcctaaagattttgtcctaaacgctgtagaagt<br>gaaagttggtgcgcattttcggcgttcgaaacttctccgcagtgaaagataaatgac | Linker sequence for gRNA multiplexing                        |
| BM_083.f           | <b>GATATTGAAAAAGGACATTGGTTTTAGAGCTAGAAATAG<br/>CAAG</b>                                                                                                                                                                                                                              | TFC3 gRNA target in SCE (sRNA connect)                       |
| BM_083.r           | <b>CAATGTCCTTTTTCAATATCGATCATTTATCTTTCACTGC<br/>GGAG</b>                                                                                                                                                                                                                             | TFC3 gRNA target in Sce (snr52 connect)                      |
| BM_084.f           | <b>TTAGGCTTAGCAGGCGATGGTTTTAGAGCTAGAAATAG<br/>CAAG</b>                                                                                                                                                                                                                               | EXO84 gRNA target in Sce (sRNA connect)                      |
| BM_084.r           | <b>CCATCGCCTGCTAAGCCTAAGATCATTTATCTTTCACTGC<br/>GGAG</b>                                                                                                                                                                                                                             | EXO84 gRNA target in Sce (snr52 connect)                     |
| BM_085.f           | <b>AGACCAGGCTGGCAATTCAGTTTTAGAGCTAGAAATAG<br/>CAAG</b>                                                                                                                                                                                                                               | PGI1 gRNA target in Sce (sRNA connect)                       |
| BM_085.r           | <b>CTGAATTGCCAGCCTGGTCTGATCATTTATCTTTCACTGC<br/>GGAG</b>                                                                                                                                                                                                                             | PGI1 gRNA target in Sce (snr52 connect)                      |
| BM_107.f           | <b>CAATTTGGTCTGTATGTCCTGTTTTAGAGCTAGAAATAG<br/>CAAG</b>                                                                                                                                                                                                                              | RAD52 gRNA target in SCE (sRNA connect)                      |
| BM_107.r           | <b>AGGACATACAGACCAAATTGGATCATTTATCTTTCACTGC<br/>GGAG</b>                                                                                                                                                                                                                             | RAD52 gRNA target in SCE (snr52p connect)                    |
| BM_108.f           | <b>CAGAGTCACAGCTTCAGTACGTTTTAGAGCTAGAAATAG<br/>CAAG</b>                                                                                                                                                                                                                              | RAD51 gRNA target in SCE (sRNA connect)                      |
| BM_108.r           | <b>GTACTGAAGCTGTGACTCTGGATCATTTATCTTTCACTGC<br/>GGAG</b>                                                                                                                                                                                                                             | RAD51 gRNA target in SCE (snr52p connect)                    |

|          |                                                         |                                                  |
|----------|---------------------------------------------------------|--------------------------------------------------|
| BM_109.f | <b>GTTCATTAGCTGTATCCCTGGTTTTAGAGCTAGAAATAG<br/>CAAG</b> | LIF1 gRNA target<br>in SCE (snr52p<br>connect)   |
| BM_109.r | <b>CAGGGATACAGCTAATGAACGATCATTTATCTTTCCTG<br/>CGGAG</b> | LIF1 gRNA target<br>in SCE (snr52p<br>connect)   |
| BM_113.f | GCTCCGTTTAGGTGATAAACG                                   | sequencing check<br>for TFC3                     |
| BM_113.r | CTCTCCATAACAAGGCCTTG                                    | sequencing check<br>for TFC3                     |
| BM_114.f | CTAGATATGCAAAAACCACAAGGA                                | sequencing check<br>for DNA19                    |
| BM_114.r | CTGTTCAAGCTCCAAAACGC                                    | sequencing check<br>for DNA19                    |
| BM_125.f | ATGGACAAGAAGTACTCCATTG                                  | very front of Cas9                               |
| BM_125.r | ACACCTTCCTCTTCTTCTTGG                                   | reverse primer (end<br>of Cas9 NLS)              |
| BM_140.f | AAGGAGGTTGCCAAGAAGTCTGCTG                               | sce 288c Rad52<br>forward checking<br>primer     |
| BM_140.r | GCAAATTTTTTATTTGTTTCGGCCAGG                             | sce 288c Rad52<br>reverse checking<br>primer     |
| BM_141.f | GAGTGTAGCGACAAAGAGCAGACGTA                              | S288C strain<br>RAD51 forward<br>checking primer |
| BM_141.r | GTACGGAACGCAACCTAAG                                     | S288C RAD51<br>reverse checking<br>primer        |
| BM_142.f | GCATAGAAGTGAAGAGAATTGTGC                                | S288C LIF1<br>forward checking<br>primer         |
| BM_142.r | GATGCGATACTATAATACTCTTTGCC                              | S288C LIF1 reverse<br>checking primer            |
| BM_143.f | TCTACACTTTGACTTTAGTGATCAT                               | S288C LIG1<br>forward checking<br>primer         |
| BM_143.r | GTTACATTCCAAGCAAATAAAGCAC                               | S288C LIG1<br>reverse checking<br>primer         |
| BM_144.f | TTAAGTTCCTAGAAAGAAGAGGC                                 | S288C RPL7<br>forward checking<br>primer         |
| BM_144.r | GGCATTAGATAACTAACAACCTATGTAC                            | S288C RPL7<br>reverse checking<br>primer         |
| BM_145.f | GGTTTGAATCTGAAAGGCATTTGG                                | S288C DNA52<br>forward checking<br>primer        |
| BM_145.r | TTGTTCCGAGCAGCAATGG                                     | S288C DNA52<br>reverse checking<br>primer        |

|                      |                              |                                            |
|----------------------|------------------------------|--------------------------------------------|
| BM_146.f             | TACAAAGAAGTCACAAGATTACTTGG   | S288C RPS37<br>forward checking<br>primer  |
| BM_146.r             | AAGCCTTTTTTCAAAATTTAACGATCAA | S288C RPS37<br>reverse checking<br>primer  |
| BM_147.f             | GCGGTGTATGCGTATAAGGCC        | S288C ISP42<br>forward checking<br>primer  |
| BM_147.r             | TTCAACCATAAAAAAGCCAAGGG      | S288C ISP42<br>reverse checking<br>primer  |
| BM_148.f             | GCTCCGTATTATAAAAATTAGGACCAG  | S288C RPO22<br>forward checking<br>primer  |
| BM_148.r             | ATTACTATTGCCTACTTGTTTACCC    | S288C RPO22<br>reverse checking<br>primer  |
| BM_149.f             | GTTTTCAGTGCTATATTCGAAAGAGC   | S288C RPL 17<br>forward checking<br>primer |
| BM_149.r             | GAGTTATGTGATATGACGGGGAG      | S288C RPL 17<br>reverse checking<br>primer |
| BM_155.f             | GAGCAAATTTTACGCATTTGC        | S288C LIG1<br>forward checking<br>primer   |
| BM_155.r             | GAACGCTGTCTCAATTTTCATC       | S288C LIG1<br>reverse checking<br>primer   |
| checking_ACC2_<br>F  | CTGGTTGTTACAGGTTTCAGAG       | S288C ACC2<br>forward checking<br>primer   |
| checking_ACC2_<br>R  | GGTCTTAGGAACCTCATCTGG        | S288C ACC2<br>reverse checking<br>primer   |
| checking_ACP2_<br>F  | CGCAGCAACCTATAGAAAAC         |                                            |
| checking_ACP2_<br>R  | CCGTAATCATCATCGTCACC         |                                            |
| checking_DNA6_<br>F  | GCCGCTGACATCTTTGTC           |                                            |
| checking_DNA6_<br>R  | CTACATCCTCCACATCTTCAC        |                                            |
| checking_DNA19_<br>F | CAAGGAAAAACAGGAAGAGAAG       |                                            |
| checking_DNA19_<br>R | CTCTTTGGCACTTTTCCCAC         |                                            |
| checking_DNA26_<br>F | CTTCTGACACCTATTACCCTC        |                                            |
| checking_DNA26_<br>R | GATTGGTTCCGTGGAGAAAG         |                                            |



|                    |                          |                                          |
|--------------------|--------------------------|------------------------------------------|
| checking_DNA43_F   | GGAACGTAAGTTTGTCAATTCAAC |                                          |
| checking_DNA43_R   | GGGACACCAACCTAAATCTC     |                                          |
| checking_ISP45_F   | GGGATAAGAGGGCAGGAC       |                                          |
| checking_ISP45_R   | GGGGTTTTCACTTTCATCCC     |                                          |
| checking_PRF1_F    | GACCCTTCTCATTCCCTTC      |                                          |
| checking_PRF1_R    | CTTGGTGGCCTCACCG         |                                          |
| checking_PRS3_F    | CTTTGCCAGCGCAGG          |                                          |
| checking_PRS3_R    | GGCAGCACGTTTTGCC         |                                          |
| checking_RPL5_F    | CAGAGGCCAACCTTACTTTTG    |                                          |
| checking_RPL5_R    | CCACCGTCAGAAGCAC         |                                          |
| checking_RPL10_A_F | CAGCAATGGGTGCCTAC        |                                          |
| checking_RPL10_A_R | GGCACGACGACCAACTC        |                                          |
| checking_RPL10E_F  | GCCATAAGATACATAAGCGG     |                                          |
| checking_RPL10E_R  | CCTTGTTACCGGCGTC         |                                          |
| checking_RPL37_A_F | CGGAACGCATGCACACC        |                                          |
| checking_RPL37_A_R | CTTAGCCTTGGCACCCC        |                                          |
| checking_RPS4_F    | CATCAACTTCCGTGTTCC       |                                          |
| checking_RPS4_R    | GACCGGCTCTGGTTTG         |                                          |
| checking_RPS13B_F  | CTGATGGCTAGCCGCC         |                                          |
| checking_RPS13B_R  | ACAGTTCTGTAGTATCTGGCC    |                                          |
| checking_RPS21_F   | GACGAACTAGAAGTACACAAC    |                                          |
| checking_RPS21_R   | GTAGCACCGGCTCTACC        |                                          |
| BM_177.f           | cctatgtctgccctaagaag     | For checking the presence of LEU2 marker |
| BM_177.r           | gcaaggatttttaacttctcg    | For checking the presence of LEU2 marker |
| BM_178.f           | cgcatttaagcataaacag      | For checking the 2micron origin on p426  |
| BM_178.r           | cgaagcatctgtcttc         | For checking the 2micron origin on p426  |

|              |                                                |                                                    |
|--------------|------------------------------------------------|----------------------------------------------------|
| BM_125.ff    | gctcgaaaacctcatcgc                             | Additional Cas9 check                              |
| BM_125.f3    | cacatttcggataccctact                           | Additional Cas9 check                              |
| BM_142.rr    | GGATGCAAGGTAAGTTCAGC                           | alternative LIF1 sequencing to make 500bp fragment |
| BM_140.rr    | GTTAGCCTCAGCAGGTG                              | alternative RAD52 sequencing for larger fragment   |
| sce_acc2.f   | TATTAGTCTATAATGGCCAGTTTTAGAGCTAGAAATAGC AAG    | Gibson sgRNA target oligos for respective genes    |
| sce_acp2.f   | AACATGAGTTCTTATAGGGGGTTTTAGAGCTAGAAATAGC AAG   |                                                    |
| sce_dna19.f  | TTGTCCTCTAGCTTAAGGAGTTTTAGAGCTAGAAATAGC AAG    |                                                    |
| sce_dna26.f  | TAAATATTTTTCAATGTGCGTTTTAGAGCTAGAAATAGCA AG    |                                                    |
| sce_dna43.f  | TCAACCGCTAAAATTTACGGTTTTAGAGCTAGAAATAGC AAG    |                                                    |
| sce_dna52.f  | TCCATTATTATGTTTCAAGTTTTTAGAGCTAGAAATAGCA AG    |                                                    |
| sce_dna6.f   | CCGTAACAGTAAGCTAGAAGTTTTAGAGCTAGAAATAGC AAG    |                                                    |
| sce_isp42.f  | GAGGCCTCTGCTAATGGAGTGTTTTTAGAGCTAGAAATAGC AAG  |                                                    |
| sce_isp45.f  | GCCGGACGTCCTGATAAAAGTTTTAGAGCTAGAAATAGC AAG    |                                                    |
| sce_lig1.f   | GCGATGCCTAGCCCATATGAGTTTTAGAGCTAGAAATAGC AAG   |                                                    |
| sce_prf1.f   | TCGCAAATTATGTCTTGGCAGTTTTAGAGCTAGAAATAGC AAG   |                                                    |
| sce_prs3.f   | TTAGCACCAGATGTCCACCGTTTTAGAGCTAGAAATAGC AAG    |                                                    |
| sce_rpl1.f   | GAAACGAGAGGAGTAAGCAGGTTTTAGAGCTAGAAATAG CAAG   |                                                    |
| sce_rpl10a.f | TTGGGTTACAAAGCTAAGCAGTTTTAGAGCTAGAAATAGC AAG   |                                                    |
| sce_rpl10e.f | TATAATAAGTTTGAAATGGGGTTTTAGAGCTAGAAATAGC AAG   |                                                    |
| sce_rpl17.f  | TAGATTA AAAATGGCTAGATAGTTTTAGAGCTAGAAATAGC AAG |                                                    |
| sce_rpl7.f   | AGCAGCTGGATAACCACAGGGTTTTAGAGCTAGAAATAGC AAG   |                                                    |
| sce_rpl37a.f | AATTCCTTCCTTTCCCTAGGTTTTAGAGCTAGAAATAGCA AG    |                                                    |
| sce_rpo22.f  | CTCAGAAAAGTATTATGATGGTTTTAGAGCTAGAAATAGC AAG   |                                                    |
| sce_rps13b.f | ACTCTAGAAATGCTCCAGCTGTTTTAGAGCTAGAAATAGC AAG   |                                                    |
| sce_rps21.f  | AATCGACACCTCTGTAAGAGGTTTTAGAGCTAGAAATAGC AAG   |                                                    |

|              |                                                   |
|--------------|---------------------------------------------------|
| sce_rps37.f  | GTCTTGAGATTGAGAGGTTGGGTTTTAGAGCTAGAAATAGC<br>AAG  |
| sce_rps4.f   | GAAGCTCAACAACAAAAGAGGTTTTAGAGCTAGAAATAG<br>CAAG   |
| sce_acc2.r   | TGGGCCATTATAGACTAATAGATCATTTATCTTTCACTGCG<br>GAG  |
| sce_acp2.r   | CCCCTATAAGAACTCATGTTGATCATTTATCTTTCACTGCG<br>GAG  |
| sce_dna19.r  | CTCCTTAAGCTAGAGGACAAGATCATTTATCTTTCACTGCG<br>GAG  |
| sce_dna26.r  | CGCACATTGAAAAATATTTAGATCATTTATCTTTCACTGCG<br>GAG  |
| sce_dna43.r  | CGTGAAATTTTAGCGGTTGAGATCATTTATCTTTCACTGCG<br>GAG  |
| sce_dna52.r  | ACTTGAAACATAATAATGGAGATCATTTATCTTTCACTGCG<br>GAG  |
| sce_isp45.r  | CTTTTATCAGGACGTCCGGCGATCATTTATCTTTCACTGCG<br>GAG  |
| sce_lig1.r   | TCATATGGGCTAGGCATCGCGATCATTTATCTTTCACTGCG<br>GAG  |
| sce_prf1.r   | TGCCAAGACATAATTTGCGGAGATCATTTATCTTTCACTGCG<br>GAG |
| sce_prs3.r   | CGGTGGACATCTGGTGCTAAGATCATTTATCTTTCACTGCG<br>GAG  |
| sce_rpl1.r   | CTGCTTACTCCTCTCGTTTTCGATCATTTATCTTTCACTGCGG<br>AG |
| sce_rpl10a.r | TGCTTAGCTTTGTAACCCAAGATCATTTATCTTTCACTGCG<br>GAG  |
| sce_rpl10e.r | CCCATTTCAAACCTTATTATAGATCATTTATCTTTCACTGCG<br>GAG |
| sce_rpl17.r  | TATCTAGCCATTTTAATCTAGATCATTTATCTTTCACTGCG<br>GAG  |
| sce_rpl7.r   | CCTGTGGTTATCCAGCTGCTGATCATTTATCTTTCACTGCG<br>GAG  |
| sce_rpl37a.r | CTAGGGAAAAGGAAAGAATTGATCATTTATCTTTCACTGC<br>GGAG  |
| sce_rpo22.r  | CATCATAATACTTTTCTGAGGATCATTTATCTTTCACTGCG<br>GAG  |
| sce_rps13b.r | AGCTGGAGCATTTCTAGAGTGATCATTTATCTTTCACTGCG<br>GAG  |
| sce_rps21.r  | CTCTTACAGAGGTGTCGATTGATCATTTATCTTTCACTGCG<br>GAG  |
| sce_rps37.r  | CCACCTCTCAATCTCAAGACGATCATTTATCTTTCACTGCG<br>GAG  |
| sce_rps4.r   | CTCTTTTGTTGTTGAGCTTCGATCATTTATCTTTCACTGCGG<br>AG  |
